# Supplementary material
Source: Springer Nature journal article supplement (https://www.springermedizin.de/resource/supplementary/12979_2012_116_MOESM1_ESM.pdf/9603426)

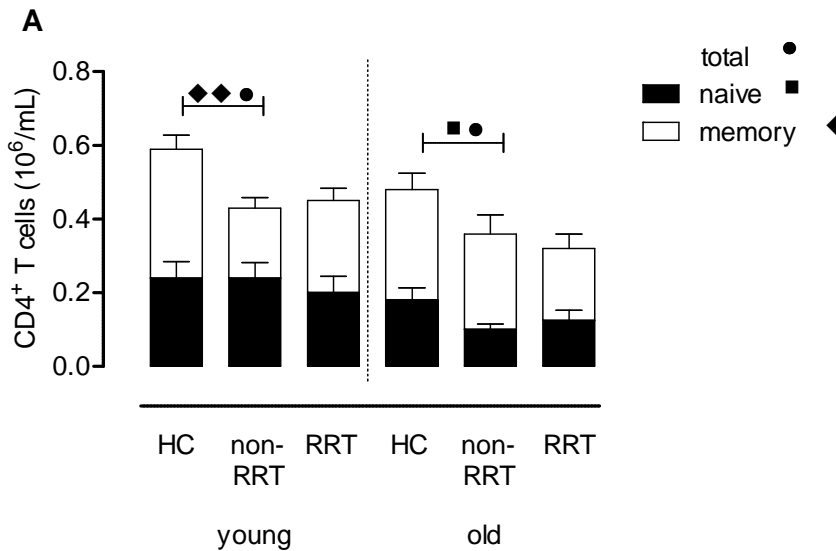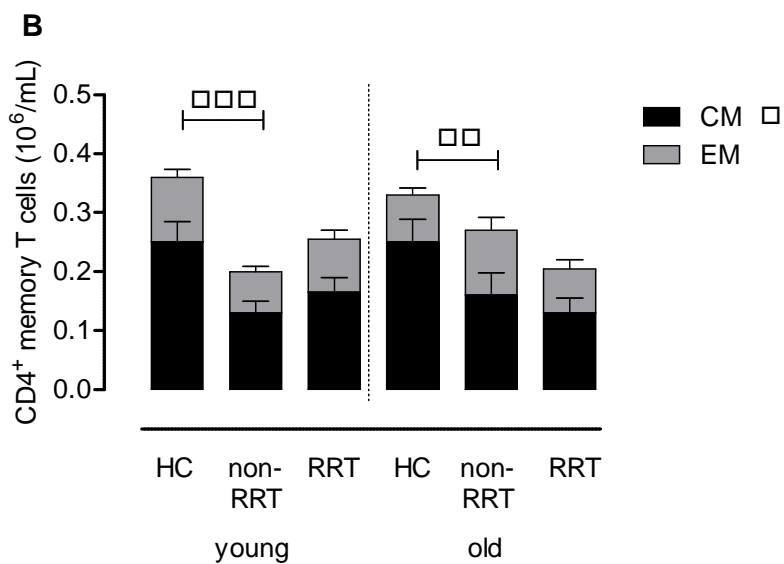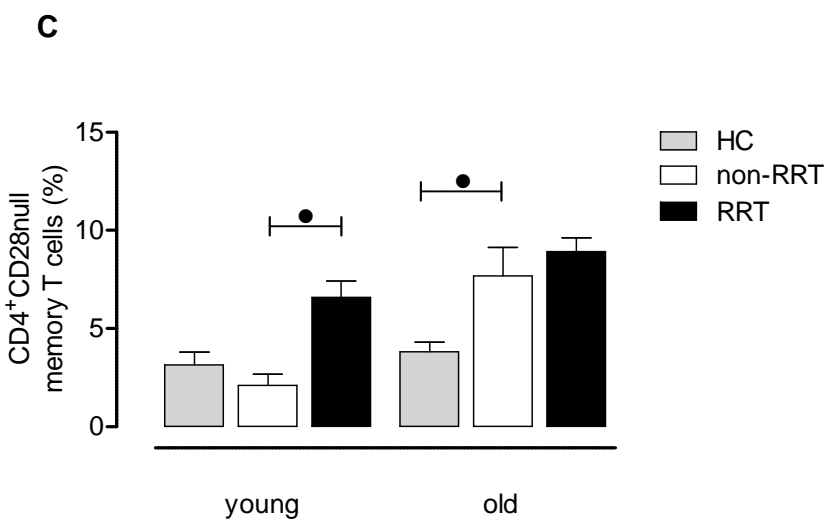

Supplement: MOESM1 [file 9603426]
